# Supplementary material
Source: MDPI journal article supplement (https://www.mdpi.com/2673-7655/3/2/12)
Supplement: s1 [file s1]

Table S4: Statistics of antioxidant capacity (Reducing power) of Portuguese wheat germplasm evaluated during crop season 2004-05 and 2009-10

| Wheat Species        | Crop Season | Reducing Power* |               |                 |               |
|----------------------|-------------|-----------------|---------------|-----------------|---------------|
|                      |             | Free phenolics  |               | Bound phenolics |               |
|                      |             | Range           | Average       | Range           | Average       |
| T. aestivum<br>(n=6) | 2004-05     | 0.083 - 0.106   | 0.093 ± 0.004 | 0.136 - 0.169   | 0.157 ± 0.006 |
|                      | 2009-10     | 0.086 - 0.101   | 0.092 ± 0.003 | 0.150 - 0.200   | 0.167 ± 0.008 |
|                      | Combined    | 0.084 - 0.103   | 0.090 ± 0.003 | 0.154 - 0.185   | 0.162 ± 0.005 |
| T. durum<br>(n=8)    | 2004-05     | 0.076 - 0.089   | 0.082 ± 0.002 | 0.134 - 0.191   | 0.151 ± 0.007 |
|                      | 2009-10     | 0.080 - 0.102   | 0.090 ± 0.003 | 0.138 - 0.238   | 0.155 ± 0.011 |
|                      | Combined    | 0.080 - 0.095   | 0.086 ± 0.002 | 0.139 - 0.205   | 0.158 ± 0.007 |

\*The values were expressed as absorbance. High absorbance indicates high RP ability.
