# Supplementary material
Source: MDPI journal article supplement (https://www.mdpi.com/2673-7655/3/2/12)
Supplement: s1 [file s1]

Table S3: Statistics of antioxidant activity (DPPH % and ABTS%) of Portuguese wheat germplasm evaluated during crop season 2004-05 & 2009-10.

| Wheat Species        | Crop Season | Antioxidant activity |             |                 |              |                |         |                 |             |
|----------------------|-------------|----------------------|-------------|-----------------|--------------|----------------|---------|-----------------|-------------|
|                      |             | DPPH (%)             |             |                 |              | ABTS (%)       |         |                 |             |
|                      |             | Free Phenolics       |             | Bound Phenolics |              | Free Phenolics |         | Bound Phenolics |             |
|                      |             | Range                | Average     | Range           | Average      | Range          | Average | Range           | Average     |
| T. aestivum<br>(n=6) | 2004-05     | 0.66-5.42            | 2.59 ± 0.80 | 16.97-22.15     | 19.60 ± 0.84 | nd             | nd      | 36.0-64.3       | 55.1 ± 4.30 |
|                      | 2009-10     | nd-7.34              | 3.50 ± 1.24 | 9.24-19.35      | 14.37 ± 1.65 | nd-7.75        | 2.1     | 72.8-81.2       | 75.7 ± 1.27 |
|                      | Combined    | 0.38-5.19            | 3.04 ± 0.82 | 13.11-19.67     | 17.41 ± 0.96 | nd-3.9         | 1.1     | 54.5-70.1       | 65.4 ± 2.52 |
| T. durum<br>(n=8)    | 2004-05     | 0.53-6.11            | 2.64 ± 0.66 | 12.11-23.27     | 17.85 ± 1.50 | nd             | nd      | 12.6-80.1       | 53.1 ± 5.59 |
|                      | 2009-10     | nd-11.2              | 3.40 ± 1.36 | 9.10-28.43      | 18.98 ± 2.06 | nd             | nd      | 39.1-80.4       | 66.9 ± 4.33 |
|                      | Combined    | 0.95-6.59            | 2.54 ± 0.67 | 11.99-25.44     | 18.14 ± 1.42 | nd             | nd      | 41.8-80.3       | 60.0 ± 3.95 |

n and nd denote number of genotypes and not detected, respectively
