# Supplementary material
Source: MDPI journal article supplement (https://www.mdpi.com/2673-7655/3/2/12)
Supplement: s1 [file s1]

**Table S1:** Details of Portuguese wheat genotypes used in present study

| <i>Triticum aestivum</i> |                      |                         | <i>Triticum durum</i> |                      |                               |
|--------------------------|----------------------|-------------------------|-----------------------|----------------------|-------------------------------|
| <i>S. No.</i>            | <b>Passport Code</b> | <b>Name of Genotype</b> | <i>S. No.</i>         | <b>Passport Code</b> | <b>Name of Genotype</b>       |
| 1                        | 1                    | Alentejano              | 47                    | 2                    | Alentejo                      |
| 2                        | 4                    | Almadense               | 48                    | 3                    | Aexandre                      |
| 3                        | 5                    | Anafil Claro            | 49                    | 6                    | AnafilEscuro                  |
| 4                        | 7                    | Ardito                  | 50                    | 8                    | Argelino                      |
| 5                        | 14                   | Belém                   | 51                    | 9                    | Asa de Corvo (a)              |
| 6                        | 23                   | Eborense                | 52                    | 10                   | Asa de Corvo (b)              |
| 7                        | 24                   | Egipcio                 | 53                    | 11                   | Bagudo                        |
| 8                        | 30                   | Fronteirico             | 54                    | 12                   | Barba de Lobo (a)             |
| 9                        | 31                   | Funchal                 | 55                    | 13                   | Barba de Lobo (b)             |
| 10                       | 32                   | Galego Barbudo          | 56                    | 15                   | Branco                        |
| 11                       | 33                   | Galego Rapado           | 57                    | 17                   | Candeal                       |
| 12                       | 34                   | Gentil Rosso            | 58                    | 18                   | Corado                        |
| 13                       | 36                   | Grécia                  | 59                    | 19                   | Dezassete                     |
| 14                       | 37                   | Guaditano               | 60                    | 20                   | Duraziorijo                   |
| 15                       | 38                   | Ideal                   | 61                    | 22                   | Durazio Molar Glabro          |
| 16                       | 40                   | Liz                     | 62                    | 25                   | Entrelargo do Montijo (a)     |
| 17                       | 43                   | Magueija                | 63                    | 26                   | Entrelargo do Montijo (b)     |
| 18                       | 44                   | Manzanares              | 64                    | 27                   | Entrelargo do Montijo (c)     |
| 19                       | 46                   | Mestiço                 | 65                    | 28                   | Escuro                        |
| 20                       | 47                   | Mirandez                | 66                    | 35                   | GiganteInglês                 |
| 21                       | 48                   | Mocho Cabeçudo          | 67                    | 39                   | Javardo                       |
| 22                       | 49                   | Mocho Espiga Quadrada   | 68                    | 41                   | Lobeiro                       |
| 23                       | 51                   | Mocho Espiga Ruivo      | 69                    | 45                   | Marquês                       |
| 24                       | 52                   | Mochou Rapado           | 70                    | 54                   | Mongia (a)                    |
| 25                       | 53                   | Mole Algarvio           | 71                    | 55                   | Mongia (b)                    |
| 26                       | 64                   | Português               | 72                    | 56                   | Mongia de grãoescuro          |
| 27                       | 69                   | Precoce                 | 73                    | 57                   | MouriscoRuivo (a)             |
| 28                       | 73                   | Ribeiro(a)              | 74                    | 58                   | MouriscoRuivo (b)             |
| 29                       | 74                   | Ribeiro(b)              | 75                    | 59                   | Mourisco                      |
| 30                       | 75                   | Rieti                   | 76                    | 60                   | MouriscoFino                  |
| 31                       | 77                   | Ruivo                   | 77                    | 61                   | Mourisco Preto de Grão Escuro |
| 32                       | 79                   | Sacho                   | 78                    | 62                   | Mourisco Preto                |
| 33                       | 80                   | Saloio (a)              | 79                    | 63                   | Pombinho                      |
| 34                       | 81                   | Saloio (b)              | 80                    | 65                   | Preto Amarelo                 |
| 35                       | 82                   | Santareno               | 81                    | 66                   | Preto Algarvio (a)            |
| 36                       | 84                   | Serrano (b)             | 82                    | 68                   | PraganaPreta                  |
| 37                       | 87                   | Tremês Branco           | 83                    | 72                   | Raspinegro                    |
| 38                       | 88                   | Tremês Preto            | 84                    | 76                   | Rubião de Barba Preta         |
| 39                       | 91                   | Tremês Ruivo            | 85                    | 78                   | Russo                         |
| 40                       | 92                   | Temporão de Coruche     | 86                    | 86                   | Sicilio                       |
| 41                       | 93                   | Transmontano(a)         | 87                    | 89                   | Trmês Preto                   |
| 42                       | 94                   | Transmontano(b)         | 88                    | 90                   | TremêsRijo                    |
| 43                       | 95                   | Transtagano             | 89                    | 97                   | VerdialRijo                   |
| 44                       | 96                   | Trigo da Maia           | 90                    | 98                   | Vermelhojoilo                 |
| 45                       | 100                  | Viloso Mole             | 91                    | 99                   | Vermelho Fino                 |
| 46                       | 101                  | Restauração             | 92                    | 102                  | Caxudo                        |
