# Supplementary material
Source: MDPI journal article supplement (https://www.mdpi.com/2673-7655/3/2/12)
Supplement: s1 [file s1]

**Table S2:** Description of phenolics content in Portuguese wheat germplasm evaluated during crop season 2004-05 and 2009-10

| <i>T. aestivum</i> (µg Ferulic Acid Equivalents (FAE)/g DW) |                        |                         |                         |                        |                         |                         | <i>T. durum</i> (µg Ferulic Acid Equivalents (FAE)/g DW) |                        |                         |                         |                        |                         |                         |
|-------------------------------------------------------------|------------------------|-------------------------|-------------------------|------------------------|-------------------------|-------------------------|----------------------------------------------------------|------------------------|-------------------------|-------------------------|------------------------|-------------------------|-------------------------|
| Passport Code                                               | Season (2004/2005)     |                         |                         | Season (2009/2010)     |                         |                         | Passport Code                                            | Season (2004/2005)     |                         |                         | Season (2009/2010)     |                         |                         |
|                                                             | Free Phenolics content | Bound Phenolics content | Total Phenolics content | Free Phenolics content | Bound Phenolics content | Total Phenolics content |                                                          | Free Phenolics content | Bound Phenolics content | Total Phenolics content | Free Phenolics content | Bound Phenolics content | Total Phenolics content |
| 1                                                           | 70 ± 7                 | 989 ± 39                | 1059 ± 22               | 246 ± 3                | 728 ± 79                | 974 ± 50                | 2                                                        | 170 ± 11               | 498 ± 31                | 668 ± 14                | 302 ± 21               | 305 ± 47                | 607 ± 18                |
| 4                                                           | 94 ± 12                | 1058 ± 109              | 1151 ± 103              | 256 ± 17               | 711 ± 68                | 967 ± 40                | 3                                                        | 207 ± 6                | 689 ± 66                | 897 ± 42                | 378 ± 22               | 229 ± 78                | 607 ± 39                |
| 5                                                           | 81 ± 19                | 989 ± 26                | 1070 ± 107              | 257 ± 28               | 739 ± 10                | 996 ± 20                | 6                                                        | 216 ± 7                | 553 ± 4                 | 769 ± 2                 | 315 ± 10               | 517 ± 32                | 832 ± 55                |
| 7                                                           | 68 ± 24                | 1017 ± 25               | 1085 ± 106              | 256 ± 16               | 881 ± 29                | 1137 ± 10               | 8                                                        | 230 ± 22               | 687 ± 10                | 917 ± 58                | 342 ± 11               | 241 ± 8                 | 583 ± 77                |
| 14                                                          | 83 ± 11                | 1160 ± 24               | 1243 ± 107              | 221 ± 12               | 730 ± 28                | 951 ± 11                | 9                                                        | 174 ± 35               | 829 ± 97                | 1003 ± 44               | 357 ± 43               | 218 ± 10                | 575 ± 23                |
| 23                                                          | 93 ± 13                | 1044 ± 11               | 1137 ± 70               | 225 ± 12               | 925 ± 69                | 1150 ± 45               | 10                                                       | 208 ± 16               | 576 ± 6                 | 784 ± 7                 | 616 ± 38               | 482 ± 24                | 1098 ± 48               |
| 24                                                          | 64 ± 19                | 966 ± 17                | 1030 ± 69               | 228 ± 22               | 1033 ± 104              | 1261 ± 60               | 11                                                       | 170 ± 31               | 652 ± 37                | 821 ± 4                 | 346 ± 73               | 375 ± 19                | 721 ± 54                |
| 30                                                          | 66 ± 28                | 771 ± 56                | 836 ± 20                | 293 ± 69               | 758 ± 161               | 1051 ± 71               | 12                                                       | 211 ± 3                | 678 ± 10                | 889 ± 5                 | 376 ± 27               | 291 ± 46                | 667 ± 14                |
| 31                                                          | 119 ± 16               | 871 ± 19                | 989 ± 102               | 219 ± 17               | 879 ± 79                | 1098 ± 42               | 13                                                       | 216 ± 26               | 535 ± 2                 | 751 ± 17                | 419 ± 13               | 243 ± 21                | 662 ± 5                 |
| 32                                                          | 133 ± 18               | 990 ± 76                | 1123 ± 41               | 281 ± 22               | 875 ± 48                | 1156 ± 20               | 15                                                       | 195 ± 5                | 859 ± 15                | 1055 ± 10               | 453 ± 8                | 332 ± 10                | 785 ± 2                 |
| 33                                                          | 101 ± 13               | 947 ± 104               | 1048 ± 107              | 212 ± 18               | 760 ± 26                | 972 ± 17                | 17                                                       | 236 ± 43               | 694 ± 81                | 930 ± 26                | 426 ± 13               | 293 ± 7                 | 719 ± 4                 |
| 34                                                          | 93 ± 10                | 490 ± 45                | 583 ± 25                | 220 ± 3                | 697 ± 35                | 917 ± 9                 | 18                                                       | 274 ± 11               | 674 ± 10                | 949 ± 69                | 486 ± 52               | 302 ± 27                | 788 ± 55                |
| 36                                                          | 76 ± 9                 | 675 ± 14                | 751 ± 82                | 220 ± 18               | 854 ± 55                | 1074 ± 33               | 19                                                       | 222 ± 10               | 825 ± 71                | 1047 ± 44               | 459 ± 4                | 303 ± 17                | 762 ± 19                |
| 37                                                          | 119 ± 24               | 756 ± 24                | 874 ± 100               | 316 ± 18               | 908 ± 12                | 1224 ± 81               | 20                                                       | 216 ± 10               | 827 ± 65                | 1043 ± 46               | 420 ± 38               | 266 ± 23                | 686 ± 11                |
| 38                                                          | 132 ± 45               | 676 ± 70                | 809 ± 17                | 233 ± 7                | 551 ± 24                | 784 ± 17                | 22                                                       | 167 ± 23               | 529 ± 29                | 695 ± 4                 | 408 ± 57               | 283 ± 44                | 691 ± 9                 |
| 40                                                          | 58 ± 9                 | 668 ± 16                | 727 ± 19                | 200 ± 1                | 977 ± 113               | 1177 ± 82               | 25                                                       | 286 ± 23               | 625 ± 40                | 911 ± 12                | 442 ± 57               | 305 ± 31                | 746 ± 19                |
| 43                                                          | 118 ± 13               | 988 ± 93                | 1105 ± 56               | 309 ± 68               | 851 ± 111               | 1159 ± 33               | 26                                                       | 273 ± 55               | 501 ± 83                | 775 ± 20                | 517 ± 87               | 393 ± 12                | 909 ± 53                |
| 44                                                          | 129 ± 41               | 687 ± 18                | 816 ± 98                | 298 ± 53               | 886 ± 23                | 1184 ± 13               | 27                                                       | 239 ± 3                | 644 ± 47                | 883 ± 32                | 564 ± 85               | 267 ± 40                | 831 ± 32                |
| 46                                                          | 117 ± 35               | 821 ± 63                | 938 ± 20                | 335 ± 98               | 826 ± 13                | 1160 ± 29               | 28                                                       | 196 ± 13               | 590 ± 33                | 786 ± 14                | 599 ± 70               | 294 ± 4                 | 892 ± 47                |
| 47                                                          | 125 ± 2                | 727 ± 29                | 852 ± 20                | 294 ± 6                | 911 ± 24                | 1205 ± 19               | 35                                                       | 187 ± 3                | 725 ± 12                | 912 ± 85                | 251 ± 22               | 385 ± 42                | 636 ± 17                |
| 48                                                          | 147 ± 11               | 814 ± 37                | 962 ± 25                | 268 ± 16               | 823 ± 42                | 1091 ± 24               | 39                                                       | 191 ± 40               | 562 ± 32                | 754 ± 6                 | 199 ± 20               | 391 ± 10                | 590 ± 14                |
| 49                                                          | 119 ± 15               | 1029 ± 53               | 1148 ± 36               | -                      | -                       | -                       | 41                                                       | 309 ± 9                | 869 ± 31                | 1178 ± 46               | 100 ± 10               | 367 ± 12                | 466 ± 14                |
| 51                                                          | 98 ± 21                | 979 ± 22                | 1077 ± 14               | 262 ± 8                | 828 ± 9                 | 1091 ± 10               | 45                                                       | 265 ± 40               | 681 ± 68                | 946 ± 20                | 93 ± 32                | 360 ± 76                | 453 ± 31                |
| 52                                                          | 86 ± 10                | 292 ± 10                | 378 ± 10                | 245 ± 4                | 677 ± 18                | 922 ± 11                | 54                                                       | 215 ± 17               | 704 ± 22                | 919 ± 4                 | 399 ± 17               | 613 ± 8                 | 1012 ± 17               |
| 53                                                          | 90 ± 29                | 838 ± 27                | 928 ± 17                | 371 ± 18               | 696 ± 4                 | 1067 ± 13               | 55                                                       | 226 ± 3                | 624 ± 57                | 849 ± 38                | 174 ± 44               | 381 ± 12                | 555 ± 55                |
| 64                                                          | 73 ± 29                | 876 ± 28                | 948 ± 13                | 216 ± 15               | 709 ± 10                | 925 ± 12                | 56                                                       | 180 ± 6                | 668 ± 47                | 848 ± 29                | 194 ± 10               | 476 ± 19                | 670 ± 62                |
| 69                                                          | 98 ± 34                | 645 ± 16                | 743 ± 90                | 260 ± 9                | 594 ± 17                | 854 ± 15                | 57                                                       | 368 ± 19               | 862 ± 31                | 1230 ± 18               | 277 ± 10               | 409 ± 72                | 687 ± 44                |
| 73                                                          | 105 ± 14               | 832 ± 20                | 937 ± 131               | 350 ± 74               | 652 ± 4                 | 1002 ± 51               | 58                                                       | 243 ± 68               | 869 ± 55                | 1111 ± 9                | 198 ± 62               | 312 ± 16                | 510 ± 39                |
| 74                                                          | 85 ± 1                 | 644 ± 10                | 729 ± 1                 | 328 ± 62               | 822 ± 23                | 1150 ± 37               | 59                                                       | 195 ± 17               | 671 ± 70                | 867 ± 37                | 139 ± 93               | 442 ± 13                | 582 ± 57                |
| 75                                                          | 75 ± 4                 | 601 ± 115               | 676 ± 79                | 257 ± 7                | 881 ± 99                | 1138 ± 72               | 60                                                       | 209 ± 20               | 530 ± 52                | 739 ± 22                | 95 ± 8                 | 445 ± 34                | 539 ± 23                |
| 77                                                          | 113 ± 15               | 713 ± 52                | 826 ± 27                | 244 ± 21               | 705 ± 32                | 949 ± 19                | 61                                                       | 268 ± 23               | 630 ± 24                | 898 ± 1                 | 292 ± 67               | 458 ± 48                | 751 ± 13                |
| 79                                                          | 94 ± 19                | 1070 ± 104              | 1165 ± 89               | 246 ± 11               | 751 ± 83                | 997 ± 54                | 62                                                       | 193 ± 10               | 538 ± 64                | 731 ± 39                | 276 ± 55               | 396 ± 75                | 672 ± 14                |
| 80                                                          | 94 ± 2                 | 592 ± 20                | 687 ± 13                | 291 ± 11               | 689 ± 27                | 980 ± 18                | 63                                                       | 262 ± 77               | 614 ± 12                | 876 ± 46                | 123 ± 60               | 391 ± 83                | 514 ± 16                |
| 81                                                          | 117 ± 47               | 742 ± 1                 | 859 ± 32                | 313 ± 2                | 684 ± 20                | 997 ± 15                | 65                                                       | 222 ± 10               | 760 ± 10                | 982 ± 64                | 109 ± 10               | 344 ± 4                 | 453 ± 3                 |
| 82                                                          | 144 ± 5                | 623 ± 37                | 766 ± 25                | 297 ± 35               | 754 ± 85                | 1051 ± 42               | 66                                                       | 327 ± 14               | 642 ± 12                | 970 ± 91                | 243 ± 25               | 509 ± 14                | 752 ± 85                |
| 84                                                          | 126 ± 8                | 746 ± 111               | 873 ± 73                | 249 ± 7                | 492 ± 12                | 742 ± 81                | 68                                                       | 430 ± 21               | 690 ± 16                | 1120 ± 103              | 175 ± 11               | 417 ± 49                | 592 ± 44                |
| 87                                                          | 228 ± 2                | 733 ± 24                | 961 ± 15                | 286 ± 38               | 873 ± 46                | 1160 ± 16               | 72                                                       | 280 ± 10               | 880 ± 54                | 1160 ± 38               | 222 ± 10               | 176 ± 26                | 398 ± 11                |
| 88                                                          | 235 ± 17               | 1018 ± 44               | 1253 ± 101              | 267 ± 12               | 736 ± 42                | 1004 ± 25               | 76                                                       | 286 ± 12               | 584 ± 16                | 870 ± 11                | 231 ± 94               | 386 ± 13                | 618 ± 57                |
| 91                                                          | 210 ± 13               | 806 ± 14                | 1016 ± 90               | 263 ± 1                | 699 ± 55                | 962 ± 44                | 78                                                       | 324 ± 94               | 801 ± 38                | 1125 ± 39               | 113 ± 1                | 322 ± 28                | 434 ± 19                |
| 92                                                          | 208 ± 5                | 736 ± 27                | 945 ± 142               | 364 ± 15               | 747 ± 21                | 1111 ± 11               | 86                                                       | 209 ± 27               | 813 ± 22                | 1022 ± 4                | 167 ± 92               | 285 ± 13                | 452 ± 28                |
| 93                                                          | 214 ± 1                | 859 ± 12                | 1073 ± 85               | 215 ± 10               | 711 ± 17                | 926 ± 80                | 89                                                       | 287 ± 13               | 517 ± 18                | 804 ± 4                 | 324 ± 46               | 463 ± 40                | 787 ± 5                 |
| 94                                                          | 252 ± 21               | 791 ± 17                | 1043 ± 3                | 278 ± 34               | 833 ± 17                | 1111 ± 72               | 90                                                       | 365 ± 16               | 310 ± 10                | 675 ± 11                | 335 ± 40               | 501 ± 74                | 836 ± 24                |
| 95                                                          | 241 ± 6                | 715 ± 12                | 956 ± 82                | 246 ± 17               | 759 ± 32                | 1005 ± 19               | 97                                                       | 330 ± 54               | 588 ± 24                | 918 ± 13                | 184 ± 21               | 373 ± 60                | 556 ± 28                |
| 96                                                          | 185 ± 10               | 895 ± 71                | 1080 ± 50               | 287 ± 04               | 698 ± 13                | 985 ± 16                | 98                                                       | 376 ± 59               | 447 ± 2                 | 823 ± 40                | 237 ± 33               | 419 ± 6                 | 656 ± 19                |
| 100                                                         | 293 ± 25               | 845 ± 35                | 1139 ± 7                | 258 ± 24               | 777 ± 48                | 1035 ± 29               | 99                                                       | 271 ± 87               | 942 ± 39                | 1212 ± 21               | 248 ± 22               | 367 ± 20                | 615 ± 1                 |
| 101                                                         | 235 ± 24               | 760 ± 65                | 995 ± 30                | 261 ± 23               | 743 ± 16                | 1004 ± 73               | 102                                                      | 382 ± 65               | 534 ± 10                | 915 ± 46                | 246 ± 43               | 301 ± 9                 | 547 ± 24                |

Note: Total phenolics (sum of free and bound)
